# Supplementary material for: Five lncRNAs Associated With Prostate Cancer Prognosis Identified by Coexpression Network Analysis
Source: PubMed Central journal article supplement — Technol Cancer Res Treat. 2020 Oct 21;19:1533033820963578. doi: 10.1177/1533033820963578 (PMC7785998; doi:10.1177/1533033820963578), 2020-10-21
Supplement: Supplementary_2.pdf [file Supplementary_2.pdf]

Supplementary TABLE 2 lncRNAs with statistical OS

| gene       | pvalue      |
|------------|-------------|
| AC113383.1 | 0.000526492 |
| LINC00920  | 0.004433146 |
| AL121820.2 | 0.004645469 |
| AC006017.1 | 0.006259217 |
| AF131215.4 | 0.009603867 |
| LINC00668  | 0.010749681 |
| AP000526.1 | 0.013138128 |
| LINC01978  | 0.013867233 |
| BX284668.2 | 0.014411877 |
| SIRLNT     | 0.014820576 |
| AP006284.1 | 0.015092298 |
| AL136084.2 | 0.016381182 |
| LINC00308  | 0.017781395 |
| LINC00900  | 0.02128179  |
| AL512652.1 | 0.022506187 |
| IGBP1.AS1  | 0.022675436 |
| LINC00857  | 0.023528474 |
| AC073655.2 | 0.024138644 |
| FGF14.AS2  | 0.025712317 |
| SNHG3      | 0.026295702 |
| AP001628.1 | 0.027561886 |
| AL136221.1 | 0.02780424  |
| LINC01187  | 0.028431128 |
| AL121821.1 | 0.028504722 |
| AC093627.6 | 0.028566818 |

VPS9D1. AS1 0. 029210009  
AC091544. 4 0. 030414973  
AP004608. 1 0. 031796629  
FENDRR 0. 031832735  
AL645608. 6 0. 032719117  
AL929601. 1 0. 03281055  
AL451069. 2 0. 033532007  
AC010973. 2 0. 033587071  
AL161716. 1 0. 035129431  
LINC00908 0. 03737778  
AC004148. 2 0. 038474911  
AP003774. 1 0. 042088654  
AC002553. 2 0. 042357579  
AC026391. 1 0. 044163847  
AC233280. 1 0. 045043897  
AC104985. 1 0. 045712208  
AL353801. 3 0. 045741758  
AL513320. 1 0. 046355258  
PVT1 0. 047153456  
AC026469. 1 0. 047303602  
AL354984. 1 0. 047379603  
AC009902. 2 0. 048846405  
SLC12A5. AS10. 049493678  
AC116351. 1 0. 049792858  
AC007663. 3 0. 049812161

---
